# Supplementary material for: An earlier introduction of bow-and-arrow in southernmost Patagonia? firing experiments, survival curve models, and geometric morphometric methods to evaluate the use of Fell IV points as arrowheads
Source: Research Square preprint supplement (doi:10.21203/rs.3.rs-3717465/v1), 2023-12-08
Supplement: Supplementary file 1 [file c2d5dcbf13c0acebc30d8ad1.xlsx]

## Sheet: suppl mat
# point	Group	Cs	PC 1	X1	Y1	X2	Y2	X3	Y3	X4	Y4	X5	Y5	X6	Y6	X7	Y7	X8	Y8	X9	Y9	X10	Y10	X11	Y11	X12	Y12	X13	Y13	X14	Y14	X15	Y15	X16	Y16	X17	Y17	X18	Y18	X19	Y19
181.1	R1	7.68269	-0.028561	-0.00460735	0.241156	0.0561353	0.203205	0.106048	0.157037	0.153484	0.113599	0.188253	0.0593374	0.223368	0.000851196	0.244942	-0.068462	0.25475	-0.136573	0.200535	-0.162436	0.138394	-0.16972	-0.109052	-0.181334	-0.177022	-0.177709	-0.242407	-0.175682	-0.244282	-0.110519	-0.223605	-0.0419044	-0.199957	0.0242654	-0.170844	0.0872761	-0.124943	0.141828	-0.0691903	0.195784
181.1	R3	5.82263	-0.68687	-0.0205585	0.213635	0.0465574	0.18498	0.103337	0.148008	0.147216	0.0997864	0.194832	0.0558472	0.231801	0.00037159	0.259091	-0.0642663	0.27008	-0.12802	0.231089	-0.148345	0.179453	-0.147366	-0.156795	-0.178458	-0.211955	-0.177493	-0.25359	-0.152033	-0.240311	-0.0898583	-0.222803	-0.0271497	-0.196309	0.0286987	-0.161088	0.079078	-0.123759	0.128692	-0.0762872	0.173891
181.1	R4	5.46759	-13529	-0.00937849	0.195998	0.053981	0.166368	0.109748	0.133627	0.156466	0.0946101	0.197222	0.0496572	0.237721	0.00103722	0.273095	-0.0525398	0.288253	-0.106958	0.245626	-0.128147	0.188277	-0.127431	-0.179274	-0.163502	-0.22732	-0.16424	-0.262791	-0.141412	-0.262873	-0.0845789	-0.237805	-0.0310255	-0.208807	0.0212194	-0.168129	0.0672792	-0.124325	0.113785	-0.0696855	0.156254
181.1	R2	7.08387	-0.458	-0.0243442	0.214456	0.0450142	0.189315	0.0953179	0.143523	0.141972	0.0965815	0.187844	0.0498338	0.230991	-0.00198959	0.264588	-0.0632163	0.281221	-0.125479	0.225168	-0.15723	0.156059	-0.164508	-0.126936	-0.19227	-0.197953	-0.188777	-0.252689	-0.146244	-0.240539	-0.08134	-0.21612	-0.0206023	-0.193779	0.0371352	-0.160203	0.0873991	-0.129943	0.139694	-0.0856701	0.183719
96	R0	8.41112	14529	-0.00833281	0.296478	0.0411943	0.248822	0.0832255	0.192389	0.117512	0.131729	0.147775	0.0663026	0.184453	-0.00120615	0.213811	-0.077555	0.233533	-0.15679	0.188403	-0.207303	0.124529	-0.231337	-0.106637	-0.229703	-0.159873	-0.207421	-0.215337	-0.192579	-0.210578	-0.120234	-0.178875	-0.0491246	-0.161273	0.0261154	-0.130657	0.0978326	-0.100567	0.171299	-0.0623059	0.242285
96	R1	7.60128	0.61231	-0.0291766	0.260766	0.0359257	0.220609	0.0843293	0.165154	0.124693	0.10605	0.1633	0.0458312	0.20279	-0.0161457	0.243128	-0.0782694	0.254795	-0.144956	0.208237	-0.172509	0.155826	-0.195768	-0.111199	-0.229856	-0.175666	-0.2067	-0.229472	-0.164012	-0.217189	-0.0914805	-0.198353	-0.0224038	-0.16964	0.0398168	-0.146883	0.10302	-0.114468	0.161278	-0.0809762	0.219575
96	R2	7.53457	0.393	-0.0179696	0.258334	0.0382167	0.212173	0.0877849	0.161016	0.126627	0.105109	0.1642	0.0485452	0.205211	-0.00810873	0.242542	-0.0690329	0.25934	-0.132742	0.209443	-0.162656	0.153147	-0.188206	-0.11747	-0.22536	-0.191773	-0.215336	-0.24519	-0.165608	-0.223497	-0.0945786	-0.199874	-0.0256043	-0.172571	0.0378821	-0.144208	0.0989056	-0.108772	0.155589	-0.0651852	0.209677
96	R3	5.50134	-14481	0.00739698	0.189941	0.0607703	0.163727	0.101508	0.128249	0.145505	0.101472	0.181272	0.063338	0.220453	0.0223976	0.255649	-0.0269365	0.290462	-0.0816317	0.275968	-0.155967	0.201368	-0.185716	-0.186278	-0.165763	-0.228087	-0.14755	-0.264882	-0.133717	-0.269984	-0.0797865	-0.244219	-0.0305763	-0.208565	0.0167111	-0.160147	0.0575316	-0.117899	0.109941	-0.06029	0.154336
96	R4	4.8794	-15479	0.000913494	0.197	0.0605898	0.159854	0.111808	0.121589	0.15618	0.0831612	0.199694	0.0486609	0.234691	0.00517907	0.266514	-0.041264	0.288757	-0.0852484	0.244202	-0.110767	0.199572	-0.149583	-0.163555	-0.189237	-0.219279	-0.150401	-0.279306	-0.128819	-0.279289	-0.0774117	-0.250627	-0.0304965	-0.213117	0.0157456	-0.170597	0.0636836	-0.123563	0.112514	-0.0635883	0.15584
154	R0	8.13153	0.79843	-0.0168663	0.277552	0.0389858	0.234444	0.0817911	0.175575	0.121707	0.115204	0.160032	0.0526394	0.199211	-0.0130169	0.237632	-0.0810068	0.251693	-0.149182	0.20125	-0.171405	0.142591	-0.184838	-0.130466	-0.21376	-0.187874	-0.202883	-0.237355	-0.182648	-0.213908	-0.115788	-0.189968	-0.0433499	-0.162408	0.0256025	-0.130785	0.0922838	-0.100923	0.159708	-0.0643386	0.224868
181.1	R0	8.44208	0.99971	-0.0182482	0.277715	0.0420154	0.236812	0.0923959	0.184553	0.133267	0.125873	0.169592	0.0620517	0.202331	-0.00875422	0.225056	-0.0884958	0.236999	-0.16491	0.189144	-0.188445	0.132754	-0.191886	-0.106829	-0.20171	-0.165062	-0.198552	-0.219778	-0.191273	-0.21614	-0.119799	-0.193364	-0.0455134	-0.174881	0.0275716	-0.145718	0.0959128	-0.112643	0.162611	-0.0708921	0.226239
40.1	R0	9.05304	12992	-0.0180267	0.296802	0.0364038	0.25259	0.0813987	0.191444	0.123509	0.127234	0.158474	0.0561166	0.202415	-0.0149858	0.230254	-0.0971399	0.235155	-0.174433	0.182224	-0.181133	0.124302	-0.187375	-0.119492	-0.19667	-0.168338	-0.203759	-0.211193	-0.206941	-0.206915	-0.131944	-0.191837	-0.0512557	-0.164392	0.0233839	-0.136059	0.0967744	-0.099656	0.166354	-0.0582291	0.234941
40.1	R1	8.83524	0.29984	-0.0161033	0.260383	0.0413742	0.216667	0.0937919	0.16476	0.143279	0.112518	0.1848	0.053462	0.221671	-0.0123223	0.250439	-0.0831449	0.248678	-0.151163	0.198897	-0.158805	0.143302	-0.160785	-0.135233	-0.173571	-0.184152	-0.184946	-0.227309	-0.187236	-0.228809	-0.119204	-0.209343	-0.0466008	-0.185929	0.0229872	-0.155917	0.0888546	-0.115447	0.149389	-0.0679904	0.208757
40.1	R2	7.84846	-0.1571	-0.0169361	0.241246	0.0439284	0.200844	0.103505	0.16251	0.149568	0.11247	0.187162	0.0532485	0.226416	-0.0092496	0.251205	-0.0815181	0.258582	-0.147607	0.213187	-0.148886	0.159754	-0.14912	-0.142482	-0.166396	-0.190529	-0.175809	-0.232959	-0.174598	-0.24102	-0.109809	-0.222633	-0.0416137	-0.196994	0.0234057	-0.16491	0.0841499	-0.115268	0.13415	-0.0695775	0.192582
40.2	R0	9.05338	14976	-0.021439	0.304757	0.0322512	0.255899	0.0751895	0.190676	0.120045	0.126682	0.150016	0.0525745	0.193698	-0.0201277	0.22551	-0.102342	0.239465	-0.1784	0.185017	-0.186982	0.125643	-0.194403	-0.105016	-0.198028	-0.162047	-0.205703	-0.214773	-0.205043	-0.210841	-0.131096	-0.180995	-0.0536307	-0.156757	0.0241772	-0.129139	0.0999392	-0.100427	0.174538	-0.0654015	0.246511
40.2	R1	8.1692	0.58204	-0.0231773	0.270071	0.0359939	0.226472	0.085476	0.16938	0.132542	0.112001	0.170676	0.0470416	0.213202	-0.0194755	0.245865	-0.0941445	0.26158	-0.161118	0.203085	-0.164727	0.138117	-0.169248	-0.117234	-0.184537	-0.174058	-0.184868	-0.226145	-0.183535	-0.220854	-0.114758	-0.206315	-0.0412	-0.177532	0.0256096	-0.152103	0.0934373	-0.116753	0.156481	-0.0723661	0.217117
40.2	R2	7.44075	-0.48106	-0.0134052	0.229351	0.0510392	0.191068	0.109789	0.152548	0.155269	0.103882	0.200387	0.0568413	0.23365	-0.00210799	0.255087	-0.0717975	0.269613	-0.133535	0.212168	-0.141724	0.148231	-0.144971	-0.127643	-0.160909	-0.195943	-0.17051	-0.258612	-0.168921	-0.251328	-0.106586	-0.232955	-0.0400259	-0.196678	0.0163764	-0.164368	0.0762109	-0.122471	0.130862	-0.0718316	0.183947
64.1	R1	7.0698	-0.4022	-0.0305096	0.228412	0.0347763	0.187174	0.0980662	0.150855	0.148711	0.105618	0.190583	0.0528314	0.23166	-0.00311714	0.263437	-0.067207	0.283675	-0.126443	0.219979	-0.148325	0.150828	-0.175428	-0.146372	-0.198392	-0.198937	-0.169656	-0.250844	-0.14365	-0.238346	-0.0862878	-0.211392	-0.0305682	-0.182888	0.0239638	-0.157051	0.0804137	-0.122018	0.132958	-0.0833573	0.18685
64.1	R2	6.26001	-19988	-0.00143249	0.162775	0.0662886	0.137104	0.124364	0.115796	0.172858	0.0876588	0.217855	0.0613015	0.253266	0.0211234	0.286286	-0.0210737	0.291698	-0.0759379	0.246962	-0.127754	0.176632	-0.149791	-0.175036	-0.174983	-0.223199	-0.149961	-0.267801	-0.12056	-0.27949	-0.0687158	-0.259505	-0.021554	-0.230303	0.0238419	-0.185261	0.0608457	-0.138637	0.103897	-0.0755455	0.135989
64.1	R0	7.74891	0.54249	-0.0115544	0.264684	0.04609	0.224296	0.0904969	0.170033	0.133149	0.116674	0.161932	0.0537567	0.199576	-0.0089885	0.238846	-0.0736713	0.253039	-0.141978	0.204737	-0.174893	0.144678	-0.186086	-0.115278	-0.194873	-0.181874	-0.198447	-0.241422	-0.182702	-0.228587	-0.113409	-0.204024	-0.0414777	-0.175448	0.0260731	-0.143297	0.0911143	-0.10553	0.1534	-0.0655294	0.216495
64.2	R1	6.72537	0.83199	-0.0331578	0.263129	0.0296302	0.21511	0.0859291	0.166977	0.124985	0.111276	0.154378	0.0512112	0.185402	-0.00723583	0.225563	-0.0592232	0.232512	-0.127755	0.192421	-0.183655	0.194029	-0.251258	-0.100613	-0.305456	-0.170633	-0.233746	-0.216368	-0.139011	-0.208465	-0.0600178	-0.188333	0.00173033	-0.172516	0.0606165	-0.144533	0.113842	-0.114336	0.166658	-0.0758935	0.216807
64.2	R2	6.0122	0.027413	-0.042647	0.219325	0.0281646	0.197024	0.0808484	0.15171	0.133044	0.111053	0.176927	0.0652251	0.211916	0.0112158	0.24334	-0.0485064	0.257013	-0.120314	0.22449	-0.179022	0.184537	-0.237521	-0.135222	-0.305973	-0.205133	-0.220887	-0.227492	-0.106849	-0.205914	-0.0364968	-0.191579	0.015346	-0.174185	0.0609486	-0.143302	0.0983171	-0.125099	0.143669	-0.0897076	0.181737
64.2	R3	5.16382	-0.7759	-0.0288738	0.195898	0.0423679	0.178869	0.0979581	0.145033	0.145694	0.105853	0.188643	0.0642403	0.216418	0.0101279	0.241097	-0.0499452	0.26943	-0.112734	0.250632	-0.171119	0.220377	-0.224159	-0.147091	-0.208118	-0.194853	-0.161314	-0.241943	-0.118714	-0.238203	-0.0586395	-0.227322	-0.00645983	-0.1996	0.0371826	-0.17042	0.082581	-0.135283	0.12605	-0.0890279	0.165368
64.2	R0	8.24695	15268	-0.00839868	0.29903	0.034765	0.249355	0.0743379	0.191162	0.114002	0.132859	0.149367	0.0693605	0.177572	-0.00348891	0.207843	-0.081812	0.222122	-0.163913	0.194416	-0.207191	0.143215	-0.219595	-0.120713	-0.236788	-0.166775	-0.226917	-0.203439	-0.195801	-0.208719	-0.116977	-0.181065	-0.0418855	-0.154807	0.0323111	-0.123558	0.103594	-0.0971491	0.175874	-0.0530181	0.240821
64	R0	8.57475	0.64084	-0.0261877	0.276896	0.0320243	0.232205	0.0790823	0.171681	0.123349	0.110027	0.166058	0.046668	0.204022	-0.0230011	0.240974	-0.0952371	0.265658	-0.157383	0.20873	-0.161802	0.148426	-0.182337	-0.114242	-0.195752	-0.175615	-0.179608	-0.234633	-0.176043	-0.223455	-0.112017	-0.201001	-0.0424926	-0.17454	0.0246447	-0.144729	0.0907655	-0.106473	0.153715	-0.0674484	0.219071
64	R1	6.41219	-1258	0.00678056	0.182035	0.0721362	0.173149	0.117583	0.139935	0.15867	0.10252	0.195642	0.060813	0.230573	0.0142318	0.265702	-0.0333775	0.278298	-0.0885329	0.23273	-0.133668	0.168132	-0.156074	-0.161975	-0.178713	-0.228594	-0.175903	-0.281428	-0.149145	-0.259262	-0.0924743	-0.235905	-0.0318171	-0.205795	0.0231891	-0.169717	0.0736244	-0.118522	0.112433	-0.0650477	0.157775
64	R2	5.49643	-17974	0.00781466	0.174618	0.0732416	0.155706	0.12183	0.124619	0.160759	0.0880574	0.19829	0.0537719	0.227516	0.0118292	0.255821	-0.0315716	0.277961	-0.0755691	0.255111	-0.109534	0.220489	-0.139358	-0.161197	-0.176502	-0.24441	-0.165582	-0.308974	-0.131249	-0.284332	-0.0828028	-0.247769	-0.031897	-0.208536	0.0171381	-0.166459	0.0647585	-0.116984	0.106691	-0.0601733	0.146877
96.1	R1	8.24592	-0.18268	-0.0178004	0.228925	0.0498029	0.196569	0.102556	0.15149	0.148366	0.10295	0.190855	0.052566	0.226835	-0.00455846	0.252502	-0.0693178	0.263082	-0.13241	0.210548	-0.153162	0.156142	-0.17929	-0.131676	-0.182253	-0.183571	-0.174565	-0.232096	-0.163292	-0.240174	-0.100086	-0.217735	-0.0366726	-0.194189	0.0270822	-0.166713	0.08938	-0.132158	0.147891	-0.0845777	0.198755
96.1	R2	7.62156	-0.66275	0.00211334	0.223713	0.056514	0.177293	0.111962	0.140184	0.15967	0.101085	0.195194	0.0525953	0.227409	1.03121e-05	0.262136	-0.0485242	0.25649	-0.106087	0.214511	-0.143811	0.162506	-0.168883	-0.13444	-0.187049	-0.189082	-0.167572	-0.243937	-0.163423	-0.252257	-0.0978995	-0.247431	-0.0313352	-0.21667	0.0255077	-0.1763	0.0808573	-0.123256	0.130189	-0.0651313	0.183149
96.1	R0	8.71246	11009	-0.0171323	0.290321	0.0347519	0.23901	0.0826668	0.179728	0.123772	0.116737	0.163212	0.0518759	0.197228	-0.0189078	0.234956	-0.0875109	0.234733	-0.158413	0.18894	-0.177537	0.139971	-0.194297	-0.117943	-0.206721	-0.167588	-0.205776	-0.212546	-0.196355	-0.214846	-0.120849	-0.197576	-0.0434382	-0.167602	0.028062	-0.134578	0.0981364	-0.105067	0.169498	-0.0653523	0.236435
4.1	R0	8.22961	0.88494	-0.0135028	0.278573	0.0432592	0.233706	0.0954672	0.182322	0.136908	0.123664	0.177771	0.0632178	0.209777	-0.00609404	0.230061	-0.0841295	0.230937	-0.160221	0.184684	-0.181447	0.130736	-0.184786	-0.122897	-0.200997	-0.170982	-0.190027	-0.216381	-0.194788	-0.217872	-0.125819	-0.195038	-0.0520302	-0.177981	0.0222557	-0.146617	0.0914884	-0.11134	0.159871	-0.0669893	0.225242
An earlier introduction of bow-and-arrow in southernmost Patagonia? firing experiments, survival curve models, and geometric morphometric methods to evaluate the use of Fell IV points as arrowheads.
Journal of Archaeological Method and Theory
Judith Charlin1, Marcelo Cardillo2, Juan Pablo Donadei Corada3, Lucas Cheme Arriaga4, Eduardo Moreno5 & Michael Shott6
1 Consejo Nacional de Investigaciones Científicas y Técnicas-Centro Nacional Patagónico-Instituto Patagónico de Ciencias Sociales y Humanas, Bvd. Brown 2915 (U9120ACD), Puerto Madryn, Argentina. judith.charlin@gmail.com.
Corresponding author
2 Consejo Nacional de Investigaciones Científicas y Técnicas-Instituto Multidisciplinario de Historia y Ciencias Humanas, Saavedra 15 5th floor (1083ACA), Ciudad Autónoma de Buenos Aires, Argentina. marcelo.cardillo@gmail.com.
3 Laboratorio de Arqueología Regional Bonaerense, Universidad Nacional de Mar del Plata, Av. Juan B. Justo 2550, (B7600) Mar del Plata, Argentina, Mar del Plata, Argentina. paolodonadeicorada@gmail.com
4 Museo Provincial de Historia Natural de La Pampa, Pellegrini 180 (6300), Santa Rosa, Argentina. l.cheme.arriaga@gmail.com
5 Consejo Nacional de Investigaciones Científicas y Técnicas-Centro Nacional Patagónico-Instituto de Diversidad y Evolución Austral, Bvd. Brown 2915 (U9120ACD), Puerto Madryn, Argentina. julianemoreno@yahoo.com
6 University of Akron-Department of Anthropology. Akron, OH 44325 USA. shott@uakron.edu
